# Supplementary material for: A novel homozygous mutation in LSS gene possibly causes hypotrichosis simplex in two siblings of a Tibetan family from the western Sichuan province of China
Source: PubMed Central journal article supplement (PMC9859656; doi:10.3389/fphys.2022.992190), 2023-01-06
Supplement: Image1.pdf [file Image1.pdf]

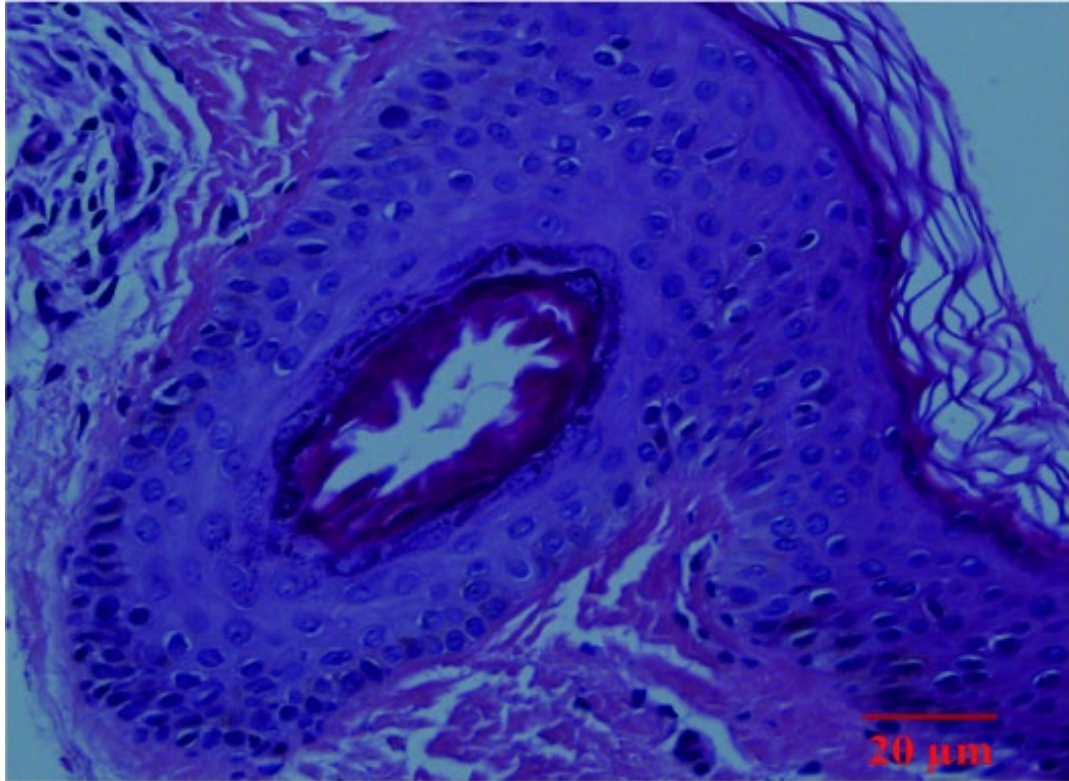

Supplementary Materials S1. Skin biopsy (400X)
